# Supplementary material for: An ultrasensitive electrochemical sensing platform based on silver nanoparticle-anchored 3D reduced graphene oxide for rifampicin detection
Source: Royal Society of Chemistry journal article supplement (doi:10.1039/d2an00452f), 2022-01-01
Supplement: d2an00452f1.pdf [file d2an00452f1.pdf]

1

## Supporting Information

2

**An ultrasensitive electrochemical sensing platform based on silver**

3

**nanoparticles anchored 3D reduced graphene oxide for rifampicin**

4

**detection**

5

Qing Zhang<sup>a,b,c</sup>, Shangshang Ma<sup>a,d</sup>, Xin Zhuo<sup>b</sup>, Cong Wang<sup>b</sup>, Hongyan Wang<sup>b</sup>,

6

Yuying Xing<sup>b</sup>, Qingyuan Xue<sup>b</sup> and Keying Zhang<sup>a,b,c\*</sup>

7

*<sup>a</sup> Key Laboratory of Spin Electron and Nanomaterials of Anhui Higher Education*

8

*Institutes, Suzhou University, Suzhou 234000, China*

9

*<sup>b</sup> School of Chemistry and Chemical Engineering, Suzhou University, Suzhou 234000,*

10

*China*

11

*<sup>c</sup> State Key Laboratory of Transducer Technology, Shanghai Institute of Microsystem*

12

*and Information Technology, Chinese Academy of Sciences, Shanghai, 200050, China*

13

*<sup>d</sup> School of Chemical Engineering, China University of Mining and Technology,*

14

*Xuzhou, 221100, China*

15

\*Corresponding authors:

16

E-mail address: zhangky1983@163.com

17

1 **Table of Contents**

2 1. **Fig. S1.** The SEM image of Ag NPs/GO composites.

3 2. **Fig. S2.** (A) DPV responses for different concentration RIF of human blood  
4 samples in 0.1 M PBS (pH 7.0) ; (B) The calibration curve of  $I_p$  and RIF  
5 concentrations.

6 3. **Table S1.** Comparison of fabricated sensors with other reported sensors.

7

8

9

10

11

12

13

14

15

16

17

18

19

20

21

22

23

24

25

26

27

28

29

30

31

32

33

34

35

36

37

38

39

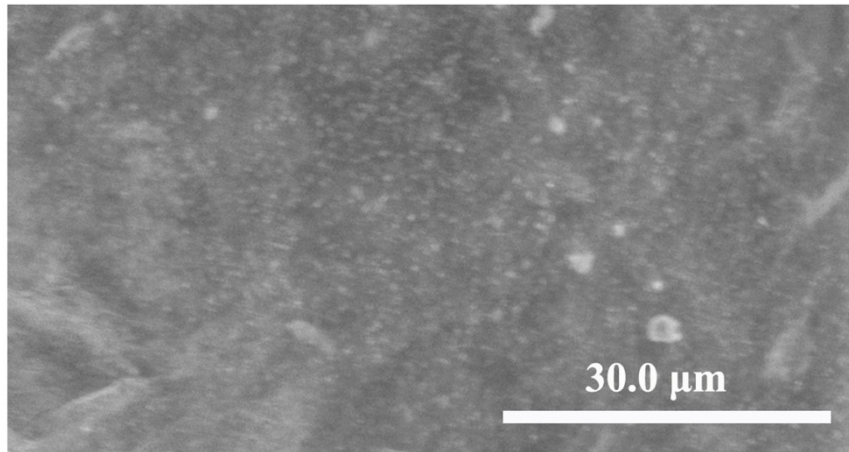

1  
2  
3  
4  
5  
6  
7  
8  
9  
10  
11  
12  
13  
14  
15  
16  
17  
18  
19  
20  
21  
22  
23

**Fig. S1.** The SEM image of Ag NPs/GO composites.

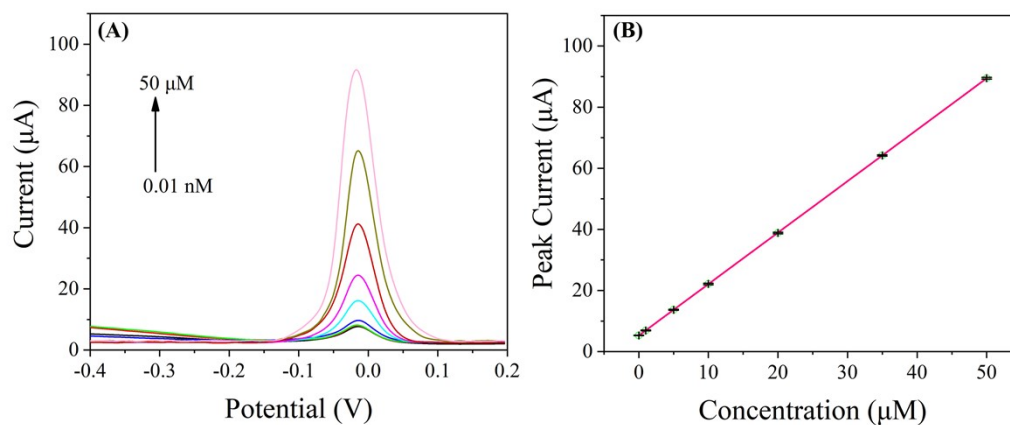

1

2 **Fig. S2.** (A) DPV responses for different concentration RIF of human blood samples  
3 in 0.1 M PBS (pH 7.0) ; (B) The calibration curve of  $I_p$  and RIF concentrations.

4

5

6

7

8

9

10

11

12

13

14

15

16

17

18

19

20

21

22

23

24

25

26

27

28

1 **Table S1.** Comparison of fabricated sensors with other reported sensors.

| Modified electrode                                      | Method             | Linear range/( $\mu\text{M}$ ) | LOD /( $\mu\text{M}$ ) | Ref.      |
|---------------------------------------------------------|--------------------|--------------------------------|------------------------|-----------|
| Ni(OH) <sub>2</sub> /RGO <sup>a</sup> /GCE              | LSV <sup>b</sup>   | 0.004-10.0                     | 0.0023                 | 1         |
| BV <sup>c</sup> /SPCE                                   | LSV                | 0.2-310                        | 0.014                  | 2         |
| PMel-Aunano <sup>d</sup> /GCE                           | LSV                | 0.08-15.00                     | 0.03                   | 3         |
| MWCNTs <sup>e</sup> -Mo <sub>2</sub> C-GCE              | DPV                | 0.5-74                         | 0.09                   | 4         |
| Au/PVP-AgNPs/PANSA <sup>f</sup> /EG-CYP2E1 <sup>g</sup> | DPV                | 2-14                           | 0.05                   | 5         |
| Pencil graphite electrode                               | DPASV <sup>h</sup> | 0.019-1.19                     | 0.013                  | 6         |
| ZrO <sub>2</sub> @chitosan/GCE                          | DPV                | 0.015-547.4                    | 0.0075                 | 7         |
| TiO <sub>2</sub> /rGO/GCE                               | DPV                | 0.01-0.1 (nM)                  | 0.03                   | 8         |
| SPIONs-CNTs <sup>i</sup> /GCE                           | i-t <sup>j</sup>   | 0.02-0.06                      | 1.178                  | 9         |
| Ag NPs/3D rGO/GCE                                       | DPV                | 0.01 nM-45 $\mu\text{M}$       | 0.810 nM               | this work |

2 <sup>a</sup> Reduced graphene oxide; <sup>b</sup> Linear sweep voltammetry; <sup>c</sup> BiVO<sub>4</sub> microspheres; <sup>d</sup> gold  
3 nanoparticles/poly-melamine nanocomposite; <sup>e</sup> Multiwalled carbon nanotubes; <sup>f</sup>  
4 polyvinylpyrrolidone/silver nanoparticles/poly(8-anilino-1-naphthalene sulphonic acid; <sup>g</sup>  
5 cytochrome P450-2E1; <sup>h</sup> Differential pulse adsorptive stripping voltammetry; <sup>i</sup> Iron oxide carbon  
6 nanotubes; <sup>j</sup> Amperometry.

7

8

9

10

11

12

13

## 2 **References**

- 3 (1) S. Rastgar and S. Shahrokhian, *Talanta*, 2014, 119, 156-163.
- 4 (2) V. Vinothkumar, A. Sangili, S. M. Chen and M. Abinaya, *Colloid. Surface. A*,  
5 2021, 624, 126849.
- 6 (3) S. Amidia, Y. H. Ardakani, M. Amiri-Aref, E. Ranjbari, Z. Sepehri and H.  
7 Bagheri, *RSC Adv.*, 2017, 7, 40111-40118.
- 8 (4) M. A. A. Lomillo, O. D. Renedo and M. J. A. Martínez, *Electrochim. Acta*,  
9 2005, 50, 1807-1811.
- 10 (5) R. F. Ajayi, U. Sidwaba, U. Feleni, S. F. Douman, O. Tovide, S. Botha, P. Baker,  
11 X. G. Fuku, S. Hamid and T. T. Waryo, *Electrochim. Acta*, 2014, 128, 149-155.
- 12 (6) A. N. Kawde, Y. Temerk and N. Farhan, *Acta Chim. Slov.*, 2014, 61, 398-405.
- 13 (7) T. W. Chen, A. S. Vasantha, S. M. Chen, D. A. Al Farraj, M. S. Elshikh, R. M.  
14 Alkufeidy and M. M. Al, *Ultrason. Sonochem.*, 2019, 59, 104718.
- 15 (8) Y. V. M. Reddy, B. Sravani, T. Łuczak, K. Mallikarjuna and G. Madhavi,  
16 *Colloid. Surface. A*, 2021, 608, 125533.
- 17 (9) K. Bano, S. Z. Bajwa, A. Ihsan, I. Hussain, N. Jameel, A. Rehman, A. Taj, S.  
18 Younus, M. Zubair Iqbal, F. K. Butt and M. Saeed, *J. Nanosci. Nanotechnol.*, 2020,  
19 20, 2130-2137.
